# Supplementary material
Source: PubMed Central journal article supplement (PMC6311674)
Supplement: JCB725212_supplementary_tables.pdf [file JCB725212_supplementary_tables.pdf]

**Collateral Perfusion Using Arterial Spin Labeling in Symptomatic Versus Asymptomatic Middle Cerebral Artery Stenosis**

**Supplementary Table 1: Multivariate ANOVA on CBF for bilateral MCA territories from PLD 1.5 to 2.5s in symptomatic and asymptomatic patients**

|                                      | F       | P      |
|--------------------------------------|---------|--------|
| PLD                                  | 325.197 | <0.001 |
| Hemisphere                           | 12.849  | <0.001 |
| Sym. versus Asym.                    | 35.838  | <0.001 |
| PLD * Hemisphere                     | 80.584  | <0.001 |
| PLD * Sym. versus Asym.              | 9.378   | 0.003  |
| Sym. versus Asym. * Hemisphere       | 1.009   | 0.317  |
| PLD * Sym. versus Asym. * Hemisphere | 2.360   | 0.127  |

**Sym. denotes symptomatic patients and Asym. denotes asymptomatic patients.**

**\* denotes interaction effect.**

**Supplementary Table 2: Two-way ANOVA on CBF separately for symptomatic and asymptomatic patients in bilateral MCA territories from PLD 1.5 to 2.5s**

| Symptomatic MCA stenosis |   | Asymptomatic MCA stenosis |   |
|--------------------------|---|---------------------------|---|
| F                        | P | F                         | P |

---

|                  |         |        |        |        |
|------------------|---------|--------|--------|--------|
| PLD              | 248.332 | <0.001 | 116.88 | <0.001 |
| Hemisphere       | 16.348  | <0.001 | 2.139  | 0.149  |
| PLD * Hemisphere | 30.894  | <0.001 | 57.637 | <0.001 |

---

**\* denotes interaction effect.**
